# Supplementary material for: Genome-wide identification and expression analysis of the SPL transcription factor family and its response to abiotic stress in Elymus sibiricus
Source: Research Square preprint supplement (doi:10.21203/rs.3.rs-6304174/v1), 2025-05-12
Supplement: Supplementary file 1 [file c7ef9419d754297746dcee7c.xlsx]

## Sheet: Supplementary table 1
	ARE	GC-motif	MBS	LTR	TC-rich	ABRE	CGTCA-motif	P-box	TCA	CAT-box	GCN4-motif	O2-site	RY-element	Ciradian	G-box	Spl	Box-4	GT1-motif	MRE	GATA-motif
evm.model.Chr08.20224	1	2	3	1	0	6	4	0	0	3	1	2	1	0	6	0	0	1	0	1
evm.model.Chr07.21378	2	3	0	1	0	3	2	0	0	3	0	1	0	0	3	0	0	1	0	2
evm.model.Chr08.20197	1	0	1	3	0	5	2	2	0	1	0	0	1	0	1	0	1	1	0	1
evm.model.Chr07.21380	1	0	1	0	0	8	1	0	0	1	0	1	4	0	6	1	0	1	0	1
evm.model.Chr08.20226	2	2	1	1	0	5	4	1	0	1	0	0	1	0	7	0	0	1	1	0
evm.model.Chr11.7263	0	2	0	1	0	0	2	0	0	2	0	2	0	0	2	5	0	0	0	0
evm.model.Chr12.6316	0	0	2	0	0	1	1	1	0	0	0	0	0	0	1	0	1	2	0	0
evm.model.Chr01.21724	0	0	0	2	0	19	4	0	0	0	0	1	3	0	5	0	0	0	0	0
evm.model.Chr02.21396	2	3	1	1	1	22	1	1	0	0	0	0	2	0	5	0	0	0	0	0
evm.model.Chr08.7950	3	3	0	3	0	2	2	0	0	2	0	1	0	2	0	1	1	2	0	0
evm.model.Chr07.7740	3	2	2	0	0	2	6	0	1	1	0	0	0	1	3	1	0	0	0	1
evm.model.Chr08.9908	2	2	0	1	0	4	1	0	0	0	0	1	0	1	6	1	0	0	0	0
evm.model.Chr07.9649	0	3	1	0	0	6	0	0	0	0	0	1	0	0	7	2	0	2	0	2
evm.model.Chr06.5732	3	0	0	0	0	5	1	1	0	0	0	0	1	0	1	5	0	4	0	0
evm.model.Chr05.4949	2	1	0	0	1	11	4	1	0	0	0	4	0	0	8	2	1	1	0	0
evm.model.Chr08.10315	4	0	1	0	1	29	0	0	0	1	0	1	3	1	15	0	0	3	0	1
evm.model.Chr07.9826	2	1	2	1	0	7	1	0	0	2	1	0	0	1	3	0	0	3	0	0
evm.model.Chr11.2280	4	0	1	1	0	4	1	1	0	3	0	0	0	0	3	1	0	2	0	1
evm.model.Chr10.14363	3	11	1	0	1	3	2	1	1	0	0	0	0	0	1	9	0	0	0	1
evm.model.Chr14.18350	5	1	1	0	0	0	3	0	0	2	0	2	0	0	0	0	1	0	3	0
evm.model.Chr09.14379	5	0	1	0	1	8	5	1	0	0	0	0	0	0	7	2	1	1	0	1
evm.model.Chr03.12983	3	3	1	1	0	3	8	2	0	0	0	1	0	0	4	4	0	0	0	0
evm.model.Chr04.13338	1	2	1	0	0	6	0	1	0	5	0	1	1	0	5	3	0	0	0	0
evm.model.Chr09.21556	4	1	1	5	0	5	9	0	0	0	0	1	1	0	3	3	0	1	1	0
evm.model.Chr10.21624	3	2	2	1	0	8	7	0	0	0	0	0	1	0	7	3	1	0	0	0
evm.model.Chr02.9866	0	0	0	0	1	7	1	0	1	0	0	0	0	0	4	2	2	0	0	1
evm.model.Chr01.9142	1	2	0	1	0	10	4	0	2	0	0	2	0	0	6	1	1	0	2	2
evm.model.Chr11.5748	1	0	1	0	1	2	2	0	1	2	0	2	0	0	4	1	0	3	0	0
evm.model.Chr12.4808	0	1	1	0	0	1	1	0	1	1	0	1	0	1	2	0	0	1	0	0
evm.model.Chr11.7419	1	1	1	0	0	0	4	1	2	1	0	4	0	0	1	2	2	4	0	1
evm.model.Chr12.6799	0	4	1	0	0	11	4	0	0	2	1	1	0	0	11	4	0	0	0	0
evm.model.Chr02.18548	0	4	0	1	0	7	3	1	0	0	0	0	1	0	4	2	0	0	0	0
evm.model.Chr01.18876	0	1	0	0	0	8	4	0	0	2	0	1	1	0	6	4	0	1	0	1
evm.model.Chr10.13639	2	0	1	1	1	6	1	0	1	1	0	0	0	0	4	1	1	0	1	0
evm.model.Chr09.13491	0	1	1	0	1	5	0	0	0	2	0	0	0	0	4	2	0	1	1	0
evm.model.Chr08.9588	0	0	0	0	0	7	2	2	0	4	0	0	1	0	4	2	1	1	0	0
evm.model.Chr07.9472	0	0	0	0	0	3	4	2	0	1	0	0	0	0	3	1	2	1	0	0

## Sheet: Supplementary table 2
	Environmental stress-related elements	Hormone responsive elements	Development related elements	Light responsive elements
evm.model.Chr07.9472	0	9	1	7
evm.model.Chr08.9588	0	11	5	8
evm.model.Chr09.13491	3	5	2	8
evm.model.Chr10.13639	5	8	1	7
evm.model.Chr01.18876	1	12	4	12
evm.model.Chr02.18548	5	11	1	6
evm.model.Chr12.6799	5	15	4	15
evm.model.Chr11.7419	3	7	5	10
evm.model.Chr12.4808	2	3	3	3
evm.model.Chr11.5748	3	5	4	8
evm.model.Chr01.9142	4	16	2	12
evm.model.Chr02.9866	1	9	0	9
evm.model.Chr10.21624	8	15	1	11
evm.model.Chr09.21556	11	14	2	8
evm.model.Chr04.13338	4	7	7	8
evm.model.Chr03.12983	8	13	1	8
evm.model.Chr09.14379	7	14	0	12
evm.model.Chr14.18350	7	3	4	4
evm.model.Chr10.14363	16	7	0	11
evm.model.Chr11.2280	6	6	3	7
evm.model.Chr07.9826	6	8	4	6
evm.model.Chr08.10315	6	29	6	19
evm.model.Chr05.4949	4	16	4	12
evm.model.Chr06.5732	3	7	1	10
evm.model.Chr07.9649	4	6	1	13
evm.model.Chr08.9908	5	5	2	7
evm.model.Chr07.7740	7	9	2	5
evm.model.Chr08.7950	9	4	5	4
evm.model.Chr02.21396	8	24	2	5
evm.model.Chr01.21724	2	23	4	5
evm.model.Chr12.6316	2	3	0	4
evm.model.Chr11.7263	3	2	4	7
evm.model.Chr08.20226	6	10	2	9
evm.model.Chr07.21380	2	9	6	9
evm.model.Chr08.20197	5	9	2	4
evm.model.Chr07.21378	6	5	4	6
evm.model.Chr08.20224	7	10	7	8

## Sheet: Supplementary table 3
SPL1F	CACAAGCTTTCGCGTGACAA
SPL1R	AGAAAGCGTCTTGATGGGCA
SPL2F	TCTGGCCAACATCGATACCG
SPL2R	ATGAGCAACGGCAGGATGAA
SPL3F	CCTTGCAGTACTCCACCTGG
SPL3R	CACAAGGTGTGCGAGTACCA
SPL4F	CTCCTCGGCAGCGTCCAT
SPL4R	GGTTCCCCGGGTGGCTAC
SPL5F	TGTTGTTGTCCTGGTCGGAG
SPL5R	CCCGGACCTATGTCTTCACG
SPL6F	CATGCTGCATGTGATGGTGG
SPL6R	AAGGTTCGCGTCCTTCTCTG
SPL7F	ACGTGGCAGTTCATCTCGTT
SPL7R	AGTGGTGTGCTGTGACCAAA
SPL8F	TTGTCGTTGGCATGGCTTTG
SPL8R	ATCCAGGCAGGTTCAGAAGC
SPL9F	ACCTCGTTCATCACCGTGTC
SPL9R	CGGGATCATCAAGTCCGAGG
SPL10F	GAAGATCCCGTGGCAGTTCA
SPL10R	GGGTTGCAGTCTCCGAAAGA
SPL11F	ACAGGAAGGTCCTCGCAAAG
SPL11R	CGGTCAACCTTAAGCTCGGT
SPL12F	TGTTGCTCAGAGCCTGATGG
SPL12R	GGAGGATTTCCCGCCGATAG
SPL13F	TTCACAGACTCGGTGCTTCC
SPL13R	CAACAATGCAGCCGGTTTCA
SPL14F	GACAAGATGTTGCCGCTGTC
SPL14R	CCAGAAGAAGAGGAGCTGCC
SPL15F	TCCATGGTGAAACGGACGAA
SPL15R	AGTGTCAAGAGCTCGCCATC
SPL16F	CTGCAGCAGTTGTTGGCTTT
SPL16R	CAACAATGCAGCCGGTTTCA
SPL17F	CGCCAATGCAAAGACGGTAG
SPL17R	CATGGGCTCTCGGAGTTTGA
SPL18F	GCTATTTTGGCTGGCACCAG
SPL18R	ATCGTTCTCTGCTCCAAGGC
SPL19F	TTGTCGTTCGAGCTCAGGAC
SPL19R	CACAAGCTTTCGCGTGACAA
SPL20F	AGAAAGCGTCTTGATGGGCA
SPL20R	TCTGGCCAACATCGATACCG
SPL21F	ATGAGCAACGGCAGGATGAA
SPL21R	CCTTGCAGTACTCCACCTGG
SPL22F	CACAAGGTGTGCGAGTACCA
SPL22R	TGTCGTTGTTCTGGTCGGAG
SPL23F	CACAAGGTGTGCGAGTACCA
SPL23R	TGTTGTTGTCCTGGTCGGAG
SPL24F	CCCGGACCTATGTCTTCACG
SPL24R	CATGCTGCATGTGATGGTGG
SPL25F	AAGGTTCGCGTCCTTCTCTG
SPL25R	ACGTGGCAGTTCATCTCGTT
SPL26F	AGTGGTGTGCTGTGACCAAA
SPL26R	TTGTCGTTGGCATGGCTTTG
SPL27F	ATCCAGGCAGGTTCAGAAGC
SPL27R	ACCTCGTTCATCACCGTGTC
SPL28F	CGGGATCATCAAGTCCGAGG
SPL28R	GAAGATCCCGTGGCAGTTCA
SPL29F	GGGTTGCAGTCTCCGAAAGA
SPL29R	ACAGGAAGGTCCTCGCAAAG
SPL30F	CGGTCAACCTTAAGCTCGGT
SPL30R	TGTTGCTCAGAGCCTGATGG
SPL31F	GGAGGATTTCCCGCCGATAG
SPL31R	TTCACAGACTCGGTGCTTCC
SPL32F	CAACAATGCAGCCGGTTTCA
SPL32R	GACAAGATGTTGCCGCTGTC
SPL33F	CCAGAAGAAGAGGAGCTGCC
SPL33R	TCCATGGTGAAACGGACGAA
SPL34F	AGTGTCAAGAGCTCGCCATC
SPL34R	CTGCAGCAGTTGTTGGCTTT
SPL35F	CAACAATGCAGCCGGTTTCA
SPL35R	CGCCAATGCAAAGACGGTAG
SPL36F	CATGGGCTCTCGGAGTTTGA
SPL36R	GCTATTTTGGCTGGCACCAG
SPL37F	ATCGTTCTCTGCTCCAAGGC
SPL37R	TTGTCGTTCGAGCTCAGGAC
ACTF	GATCTGTCCAAGCACCCCTC
ACTR	CTTCTCTCACCTTTGCCCCG
